# Supplementary material for: Clathrates of TETROL: selective inclusion of methylcyclohexanones in their energetically unfavorable axial methyl conformations
Source: Royal Society of Chemistry journal article supplement (doi:10.1039/c4cc06826b), 2014-01-01
Supplement: c4cc06826b1.pdf [file c4cc06826b1.pdf]

SUPPORTING INFORMATION FOR THE MANUSCRIPT \*\*\*\*\* to be completed

## Table of Contents

**Table S1.** Crystal data, data-collection and refinement parameters for the crystals of (a) TETROL·3-methylcyclohexanone 1·4 and (b) TETROL·4-methylcyclohexanone 1·5.

**Table S2.** Host-guest interactions (hydrogen bonds, (guest)C-H $\cdots$  $\pi$  and (guest)C-H $\cdots$ C<sub>ar</sub> interactions). Serial numbers refer to the labelled interactions in the figures.

**Table S3.** Comparative crystal structural and theoretical [G3(MP2) composite method] bond lengths, distances, torsion angles and angles for equatorial 2-methylcyclohexanone 3<sub>eq</sub>, axial 3-methylcyclohexanones 4<sub>ax</sub>, and axial 4-methylcyclohexanone 5<sub>ax</sub>.

**Figure S1.** Isolated cavities that accommodate the guest molecules in the crystals of (a) TETROL·3-methylcyclohexanone (1·4), (b) TETROL·4-methylcyclohexanone (1·5).

**Figure S2.** Stereoview illustrating the C-H $\cdots$  $\pi$  bonds (1-3) and short H $\cdots$ C<sub>ar</sub> contacts (4-6) that stabilize the axial conformer of the minor guest component ((S)-enantiomer of 3-methylcyclohexanone) in the crystal of 1·4.

**Figure S3.** Stereoview illustrating the C-H $\cdots$  $\pi$  bonds (1-2) and short H $\cdots$ C<sub>ar</sub> contacts (3-6) that stabilize the axial conformer of 4-methylcyclohexanone in the crystal of 1·5.

**Table S1. Crystal data, data-collection and refinement parameters for the crystals of (a) TETROL-3-methylcyclohexanone 1·4 and (b) TETROL-4-methylcyclohexanone 1·5.**

**(a) Crystal Data and Details of the Structure Determination for Compound 1·4**

|                                               |                                                                                                                                                     |
|-----------------------------------------------|-----------------------------------------------------------------------------------------------------------------------------------------------------|
| <i>Crystal Data</i>                           |                                                                                                                                                     |
| Formula                                       | C <sub>28</sub> H <sub>26</sub> O <sub>4</sub> , C <sub>7</sub> H <sub>12</sub> O                                                                   |
| Formula Weight                                | 538.65                                                                                                                                              |
| Crystal System                                | Monoclinic                                                                                                                                          |
| Space group                                   | P2 <sub>1</sub> (No. 4)                                                                                                                             |
| a, b, c [Å]                                   | 12.4493(6), 8.2368(4), 13.9466(7)                                                                                                                   |
| α, β, γ [°]                                   | 90, 95.843(2), 90                                                                                                                                   |
| V [Å <sup>3</sup> ]                           | 1422.69(12)                                                                                                                                         |
| Z                                             | 2                                                                                                                                                   |
| D <sub>calc</sub> [g/cm <sup>3</sup> ]        | 1.257                                                                                                                                               |
| μ(MoKα) [mm <sup>-1</sup> ]                   | 0.083                                                                                                                                               |
| F(000)                                        | 576                                                                                                                                                 |
| Crystal Size [mm]                             | 0.19 x 0.47 x 0.53                                                                                                                                  |
| <i>Data-collection</i>                        |                                                                                                                                                     |
| Temperature (K)                               | 200(2)                                                                                                                                              |
| Radiation [Å]                                 | MoKα, 0.71073                                                                                                                                       |
| θ <sub>min, max</sub> [°]                     | 2.1, 28.3                                                                                                                                           |
| Dataset                                       | -16: 16 ; -10: 11 ; -18: 18                                                                                                                         |
| Tot., Uniq. Data, R(int)                      | 26618, 6823, 0.014                                                                                                                                  |
| Observed data [I > 2.0 σ(I)]                  | 6031                                                                                                                                                |
| <i>Refinement</i>                             |                                                                                                                                                     |
| N <sub>ref</sub> , N <sub>par</sub>           | 6823, 399                                                                                                                                           |
| R, wR2, S                                     | 0.0459, 0.1354, 1.04                                                                                                                                |
| w                                             | 1/[σ <sup>2</sup> (F <sub>o</sub> <sup>2</sup> )+(0.0759P) <sup>2</sup> +0.2752P], P=(F <sub>o</sub> <sup>2</sup> +2F <sub>c</sub> <sup>2</sup> )/3 |
| Max. and Av. Shift/Error                      | 0.00, 0.00                                                                                                                                          |
| Min. and Max. Resd. Dens. [e/Å <sup>3</sup> ] | -0.27, 0.28                                                                                                                                         |

**(b) Crystal Data and Details of the Structure Determination for Compound 1·5**

|                                               |                                                                                                                                             |
|-----------------------------------------------|---------------------------------------------------------------------------------------------------------------------------------------------|
| <i>Crystal Data</i>                           |                                                                                                                                             |
| Formula                                       | C <sub>28</sub> H <sub>26</sub> O <sub>4</sub> , C <sub>7</sub> H <sub>12</sub> O                                                           |
| Formula Weight                                | 538.65                                                                                                                                      |
| Crystal System                                | Triclinic                                                                                                                                   |
| Space group                                   | P1 (No. 1)                                                                                                                                  |
| a, b, c [Å]                                   | 8.181(2), 9.952(3), 10.163(3)                                                                                                               |
| α, β, γ [°]                                   | 79.296(6), 68.813(5), 65.825(5)                                                                                                             |
| V [Å <sup>3</sup> ]                           | 703.2(3)                                                                                                                                    |
| Z                                             | 1                                                                                                                                           |
| D <sub>calc</sub> [g/cm <sup>3</sup> ]        | 1.272                                                                                                                                       |
| μ(MoKα) [mm <sup>-1</sup> ]                   | 0.084                                                                                                                                       |
| F(000)                                        | 288                                                                                                                                         |
| Crystal Size [mm]                             | 0.09 x 0.20 x 0.32                                                                                                                          |
|                                               |                                                                                                                                             |
| <i>Data-collection</i>                        |                                                                                                                                             |
| Temperature (K)                               | 173(2)                                                                                                                                      |
| Radiation [Å]                                 | MoKα, 0.71073                                                                                                                               |
| θ <sub>min, max</sub> [°]                     | 2.2, 27.1                                                                                                                                   |
| Dataset                                       | -10: 10 ; -12: 12 ; -13: 13                                                                                                                 |
| Tot., Uniq. Data, R(int)                      | 9415, 9403, 0.000                                                                                                                           |
| Observed data [I > 2.0 σ(I)]                  | 5729                                                                                                                                        |
|                                               |                                                                                                                                             |
| <i>Refinement</i>                             |                                                                                                                                             |
| N <sub>ref</sub> , N <sub>par</sub>           | 9403, 366                                                                                                                                   |
| R, wR2, S                                     | 0.0515, 0.1338, 0.945                                                                                                                       |
| w                                             | 1/[σ <sup>2</sup> (F <sub>o</sub> <sup>2</sup> )+(0.0540P) <sup>2</sup> ], P=(F <sub>o</sub> <sup>2</sup> +2F <sub>c</sub> <sup>2</sup> )/3 |
| Max. and Av. Shift/Error                      | 0.00, 0.00                                                                                                                                  |
| Min. and Max. Resd. Dens. [e/Å <sup>3</sup> ] | -0.25, 0.26                                                                                                                                 |

**Table S2.** Host-guest interactions (hydrogen bonds, (guest)C-H $\cdots\pi$  and (guest)C-H $\cdots$ C<sub>ar</sub> interactions). Serial numbers refer to the labelled interactions in the supporting figures.

Compound **1·4**: Host- (R)-enantiomer

| D-H $\cdots$ A                                 | D-H /Å | H $\cdots$ A | D $\cdots$ A | D-H $\cdots$ A (°) |
|------------------------------------------------|--------|--------------|--------------|--------------------|
| O16-H16 $\cdots$ O39A                          | 0.84   | 1.91         | 2.621(2)     | 141                |
| 1. C35A-H35A $\cdots$ Cg(C27-C32) <sup>a</sup> | 1.00   | 2.87         | 3.789(3)     | 153                |
| 2. C38A-H38C $\cdots$ Cg(C1-C6) <sup>a</sup>   | 0.99   | 2.75         | 3.584(6)     | 142                |
| 3. C37A-H37C $\cdots$ Cg(C7-C12) <sup>b</sup>  | 0.99   | 2.83         | 3.732(3)     | 151                |
| 4. C40A-H40E $\cdots$ C25 <sup>a</sup>         | 0.98   | 2.76         | 3.731(3)     | 171                |

Compound **1·4**: Host- (S)-enantiomer

| D-H $\cdots$ A                                 | D-H /Å | H $\cdots$ A | D $\cdots$ A | D-H $\cdots$ A (°) |
|------------------------------------------------|--------|--------------|--------------|--------------------|
| O16-H16 $\cdots$ O39B                          | 0.84   | 2.36         | 3.125(8)     | 152                |
| 1. C38B-H38A $\cdots$ Cg(C1-C6) <sup>b</sup>   | 0.99   | 2.49         | 3.31(1)      | 140                |
| 2. C38B-H38B $\cdots$ Cg(C7-C12) <sup>b</sup>  | 0.99   | 2.91         | 3.84(2)      | 156                |
| 3. C40B-H40B $\cdots$ Cg(C27-C32) <sup>a</sup> | 0.98   | 3.08         | 3.87(2)      | 139                |
| 4. C36B-H36A $\cdots$ C30 <sup>a</sup>         | 0.99   | 2.90         | 3.84(1)      | 159                |
| 5. C40B-H40A $\cdots$ C25 <sup>a</sup>         | 0.98   | 2.98         | 3.60(1)      | 122                |
| 6. C37B-H37A $\cdots$ C2 <sup>b</sup>          | 0.99   | 2.86         | 3.41(1)      | 116                |

Compound **1·5**: Host- guest

| D-H $\cdots$ A                                | D-H /Å | H $\cdots$ A | D $\cdots$ A | D-H $\cdots$ A (°) |
|-----------------------------------------------|--------|--------------|--------------|--------------------|
| O16-H16 $\cdots$ O39                          | 0.84   | 1.94         | 2.713(4)     | 152                |
| 1. C34-H34B $\cdots$ Cg(C7-C12) <sup>c</sup>  | 0.99   | 2.66         | 3.607        | 159                |
| 2. C38-H38B $\cdots$ Cg(C27-C32) <sup>d</sup> | 0.99   | 2.96         | 3.747        | 137                |
| 3a. C38-H38A $\cdots$ C5                      | 0.99   | 3.00         | 3.917(6)     | 154                |
| 3b. C38-H38A $\cdots$ C6                      | 0.99   | 2.99         | 3.955(6)     | 164                |
| 4. C40-H40C $\cdots$ C23 <sup>d</sup>         | 0.98   | 2.90         | 3.829(6)     | 158                |
| 5. C40-H40B $\cdots$ C4 <sup>c</sup>          | 0.98   | 2.93         | 3.764(6)     | 144                |

Symmetry code: <sup>a</sup> 1-x, ½+y, 1-z; <sup>b</sup> 1-x, ½+y, 2-z; <sup>c</sup> -1+x, y, 1+z; <sup>d</sup> x, -1+y, z

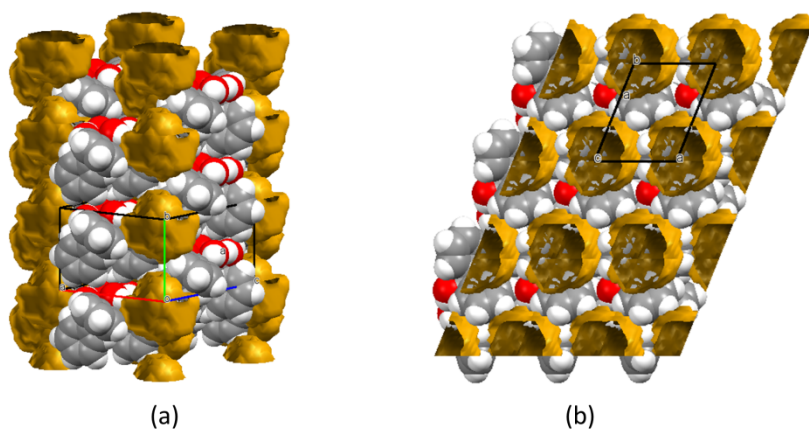

**Figure S1. Isolated cavities that accommodate guest molecules in the crystals of (a) TETROL·3-methylcyclohexanone (1·4), (b) TETROL·4-methylcyclohexanone (1·5).**

Voids mapped using contact surfaces with program Mercury CSD 3.3 (Build RC5), 2013, with a 1.5 Å probe radius and a grid spacing of 0.5 Å.

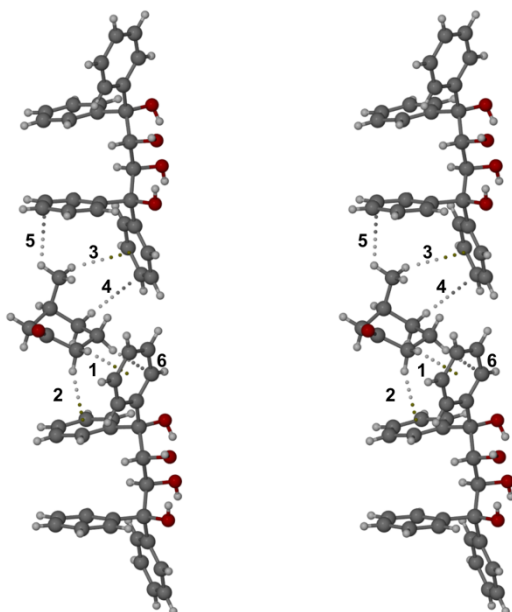

**Figure S2: Stereoview illustrating the C-H... $\pi$  bonds (1-3) and short H...C<sub>ar</sub> contacts (4-6) that stabilize the axial conformer of the minor guest component ((S)-enantiomer of 3-methylcyclohexanone) in the crystal of 1·4.**

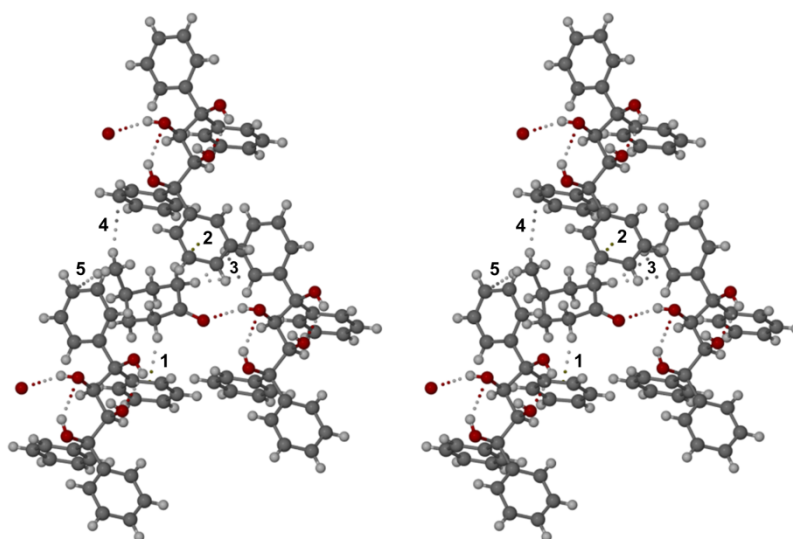

Figure S3: Stereoview illustrating the C-H... $\pi$  bonds (1-2) and short H...C<sub>ar</sub> contacts (3-6) that stabilize the axial conformer of 4-methylcyclohexanone in the crystal of 1·5.

**Table S3. Comparative crystal structural and theoretical [G3(MP2) composite method] bond lengths, distances, torsion angles and angles for equatorial 2-methylcyclohexanone 3eq, axial 3-methylcyclohexanones 4ax, and axial 4-methylcyclohexanone 5ax.**

|                 |                             | 3eq    |        |           | 4ax    |                   |           | 5ax    |                   |           |
|-----------------|-----------------------------|--------|--------|-----------|--------|-------------------|-----------|--------|-------------------|-----------|
|                 |                             | Theor. | Exp.   | Theor-Exp | Theor. | Exp.              | Theor-Exp | Theor. | Exp.              | Theor-Exp |
| Bond length/Å   | O-C1*                       | 1.23   | 1.25   | -0.02     | 1.23   | 1.21              | 0.02      | 1.23   | 1.23              | -0.01     |
|                 | Ha-C8                       |        |        |           | 1.09   | 0.98 <sup>¶</sup> | –         |        |                   |           |
|                 | Hb-C8                       |        |        |           | 1.10   | 0.98 <sup>¶</sup> | –         |        |                   |           |
|                 | Hc-C8                       |        |        |           | 1.09   | 0.98 <sup>¶</sup> | –         |        |                   |           |
|                 | Ha-C9                       |        |        |           |        |                   |           | 1.09   | 0.98 <sup>¶</sup> | –         |
|                 | Hb-C9                       |        |        |           |        |                   |           | 1.09   | 0.98 <sup>¶</sup> | –         |
|                 | Hc-C9                       |        |        |           |        |                   |           | 1.09   | 0.98 <sup>¶</sup> | –         |
| Distance/Å      | C8-C1                       |        |        |           | 3.06   | 3.04              | 0.02      |        |                   |           |
|                 | C8-Pt4                      |        |        |           | 2.91   | 2.73              | 0.19      |        |                   |           |
|                 | C8-O                        |        |        |           | 3.63   | 3.74              | -0.11     |        |                   |           |
|                 | Ha(C8)-C1                   |        |        |           | 2.73   | 2.63 <sup>¶</sup> | –         |        |                   |           |
|                 | Ha(C8)-Pt4 <sup>§</sup>     |        |        |           | 2.84   | 2.83 <sup>¶</sup> | –         |        |                   |           |
|                 | Ha(C8)-O                    |        |        |           | 3.07   | 3.13 <sup>¶</sup> | –         |        |                   |           |
|                 | Ha(C8)-H <sub>ax</sub> (C6) |        |        |           | 2.30   | 2.38 <sup>¶</sup> | –         |        |                   |           |
|                 | Hb(C8)-H <sub>ax</sub> (C6) |        |        |           | 3.07   | 2.74 <sup>¶</sup> | –         |        |                   |           |
|                 | Hc(C8)-H <sub>ax</sub> (C6) |        |        |           | 3.86   | 3.71 <sup>¶</sup> | –         |        |                   |           |
|                 | Ha(C9)-C1                   |        |        |           |        |                   |           | 3.35   | 3.21 <sup>¶</sup> | –         |
|                 | Ha(C9)-Pt4                  |        |        |           |        |                   |           | 3.94   | 3.78 <sup>¶</sup> | –         |
|                 | Ha(C9)-O                    |        |        |           |        |                   |           | 4.53   | 4.37 <sup>¶</sup> | –         |
|                 | C9-C1                       |        |        |           |        |                   |           | 3.70   | 3.62              | 0.08      |
|                 | C9-Pt4                      |        |        |           |        |                   |           | 4.31   | 4.23              | 0.08      |
|                 | C9-O                        |        |        |           |        |                   |           | 4.93   | 4.84              | 0.08      |
|                 | Ha(C9)-H <sub>ax</sub> (C2) |        |        |           |        |                   |           | 2.31   | 2.38 <sup>¶</sup> | –         |
|                 | Ha(C9)-H <sub>ax</sub> (C6) |        |        |           |        |                   |           | 2.31   | 2.27 <sup>¶</sup> | –         |
| Torsion angle/° | O-C1-C2-C3                  | -124.0 | -127.2 | 3.2       | -122.0 | -135.4            | 13.4      | 126.7  | 135.6             | -8.9      |
|                 | C1-C2-C3-C4                 | -54.1  | -55.0  | 0.9       | -55.3  | -48.6             | -6.6      | 53.5   | 53.2              | 0.2       |
|                 | C2-C3-C4-C5                 | 57.2   | 57.6   | -0.4      | 56.7   | 54.3              | 2.3       | -55.7  | -58.1             | 2.3       |
|                 | C3-C4-C5-C6                 | -56.3  | -56.0  | -0.3      | -55.3  | -54.8             | -0.5      | 55.7   | 55.0              | 0.7       |
|                 | C4-C5-C6-C1                 | 54.1   | 52.9   | 1.2       | 52.1   | 46.2              | 5.9       | -53.5  | -48.8             | -4.7      |
|                 | C5-C6-C1-C2                 | -54.7  | -53.8  | -0.9      | -54.0  | -42.6             | -11.4     | 51.9   | 45.4              | 6.5       |
|                 | C6-C1-C2-C3                 | 54.0   | 54.5   | -0.6      | 55.9   | 44.7              | 11.2      | -51.9  | -47.0             | -4.9      |
|                 | C5-C6-C1-O                  | 123.2  | 127.9  | -4.7      | 123.9  | 137.5             | -13.6     | -126.7 | -137.2            | 10.5      |
|                 | C1-C2-C4-C5                 | 1.4    | 1.3    | 0.1       | 0.0    | 4.0               | -4.0      | -2.3   | -4.4              | 2.1       |
|                 | C2-C3-C5-C6                 | 0.1    | 1.1    | -1.0      | 1.8    | 1.3               | 0.5       | 0.0    | -2.3              | 2.3       |
|                 | C3-C4-C6-C1                 | -1.5   | -2.3   | 0.8       | -1.7   | -5.8              | 4.1       | 2.3    | 6.6               | -4.3      |
|                 | C7-C2-C3-C4                 | -178.7 | 178.2  | 0.6       |        |                   |           |        |                   |           |
|                 | C7-C2-C1-C6                 | 179.0  | -178.6 | -0.5      |        |                   |           |        |                   |           |
|                 | Ha-C7-C2-H                  | -179.6 | -177.7 | -1.9      |        |                   |           |        |                   |           |
|                 | Hb-C7-C2-C1                 | 178.3  | 179.8  | -1.5      |        |                   |           |        |                   |           |
|                 | Hc-C7-C2-C3                 | -179.7 | -175.6 | -4.1      |        |                   |           |        |                   |           |
|                 | C7-C2-C1-O                  | 1.1    | -0.2   | 1.3       |        |                   |           |        |                   |           |
|                 | C8-C3-C2-C1                 |        |        |           | 69.3   | 74.0              | -4.7      |        |                   |           |
|                 | C8-C3-C4-C5                 |        |        |           | -66.8  | -66.9             | 0.1       |        |                   |           |
|                 | Ha-C8-C3-H                  |        |        |           | -175.1 | -163.7            | -11.5     |        |                   |           |
| Hb-C8-C3-C2     |                             |        |        | -178.1    | -165.7 | -12.4             |           |        |                   |           |

|             |                         | 3eq    |       |           | 4ax    |        |           | 5ax    |        |           |
|-------------|-------------------------|--------|-------|-----------|--------|--------|-----------|--------|--------|-----------|
|             |                         | Theor. | Exp.  | Theor-Exp | Theor. | Exp.   | Theor-Exp | Theor. | Exp.   | Theor-Exp |
| Hc-C8-C3-C4 |                         |        |       |           | -174.8 | -163.0 | -11.8     |        |        |           |
| C9-C4-C3-C2 |                         |        |       |           |        |        |           | 70.0   | 66.6   | 3.4       |
| C9-C4-C5-C6 |                         |        |       |           |        |        |           | -70.0  | -69.9  | -0.2      |
| Ha-C9-C4-H  |                         |        |       |           |        |        |           | 180.0  | -179.3 | -0.8      |
| Hb-C9-C4-C3 |                         |        |       |           |        |        |           | 177.6  | 179.0  | -1.4      |
| Hc-C9-C4-C5 |                         |        |       |           |        |        |           | -177.6 | -177.3 | -0.3      |
| Angle/°     | C2-C1-C6                | 115.2  | 115.7 | -0.5      | 114.5  | 117.3  | -2.8      | 114.9  | 116.3  | -1.4      |
|             | O-C1-Pt2 <sup>†</sup>   | 178.3  | 178.5 | -0.2      | 178.3  | 179.8  | -1.6      | 178.8  | 177.6  | 1.2       |
|             | C1-Pt2-Pt3 <sup>‡</sup> | 129.9  | 130.1 | -0.2      | 129.8  | 139.9  | -10.1     | 132.6  | 137.9  | -5.3      |
|             | C4-Pt3-Pt2              | 128.9  | 128.9 | 0.1       | 129.0  | 131.3  | -2.2      | 130.3  | 129.6  | 0.7       |

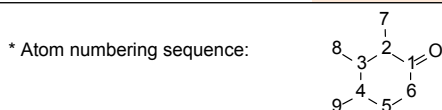

<sup>†</sup> In the crystal structures, H atoms were placed in idealized positions in a riding model [C-H (Å): methylene 0.99, tertiary 1.00, methyl 0.98]. Calculated differences in distances between the theoretical and experimental structures involving H atoms are hence uncertain.

<sup>‡</sup> Pt4: centroid (O C1). <sup>†</sup> Pt2: centroid (C2 C6). <sup>‡</sup> Pt3: centroid (C3 C5).

## Experimental Section

### Synthesis of (+)-(2*R*,3*R*)-1,1,4,4-tetraphenylbutane-1,2,3,4-tetraol **1**

This compound was synthesized according to a published procedure.<sup>1</sup> This afforded a gum which was crystallized and recrystallized from CH<sub>2</sub>Cl<sub>2</sub>/hexane/MeOH to afford (+)-(2*R*,3*R*)-1,1,4,4-tetraphenylbutane-1,2,3,4-tetraol **1** as a white solid (45 %), mp 147-149 °C (lit.<sup>2</sup>, mp 150-151 °C); [α]<sub>D</sub><sup>23</sup> +166° (c = 9.32, CH<sub>2</sub>Cl<sub>2</sub>) {lit.<sup>2</sup>, [α]<sub>D</sub><sup>25</sup> +154° (c = 1.2, CHCl<sub>3</sub>)}; ν<sub>max</sub>(solid)/cm<sup>-1</sup> 3440 (br, OH), 3294 (br, OH), 3057 (Ar), 3033 (Ar), 1598 (Ar) and 1494 (Ar); δ<sub>H</sub>(CDCl<sub>3</sub>) 3.86 (2H, d, 2COH), 4.44 (2H, d, 2HCOH), 4.72 (2H, s, 2CPh<sub>2</sub>OH) and 7.2-7.4 (20H, m, Ar); δ<sub>C</sub>(CDCl<sub>3</sub>) 72.11 (HCOH), 81.71 (CPh<sub>2</sub>OH), 124.97 (Ar), 126.05 (Ar), 127.15 (Ar), 127.27 (Ar), 128.10 (Ar), 128.37 (Ar), 128.55 (Ar), 130.08 (Ar), 143.85 (quaternary Ar) and 144.16 (quaternary Ar).

### Preparation of inclusion complexes

The complexes of **1** with cyclohexanone **2** and the methylcyclohexanones **3-5** were prepared by dissolving **1** in each of the cyclohexanones with heating, followed by slow evaporation of the latter at ambient temperature and pressure. <sup>1</sup>H NMR analysis revealed that each guest compound was included with a 1:1 host-guest ratio.

### Single crystal X-ray Diffraction

The structures were determined from X-ray data collected on Bruker diffractometers with the crystals of **1-4** and **1-5** cooled to 200(2) and 173(2) K respectively. Crystals of **1-5** showed persistent non-merohedral twinning, but the correct unit cell and orientation matrix were successfully determined from a twinned crystal using the program CELL\_NOW<sup>3</sup> The structures were solved by direct methods and refined by full-matrix least-squares.<sup>4</sup> Non-H atoms refined anisotropically, except for the minor guest component in **1-4** where isotropic refinement was employed and the refined *U*<sub>iso</sub> values were in the range 0.04-0.07 Å<sup>2</sup>. H atoms were located in difference Fourier syntheses and were subsequently placed in idealized positions in a riding model [C-H (Å): methylene 0.99, tertiary 1.00, methyl 0.98] with *U*<sub>iso</sub> values in the range 1.2-1.5 times those of their parent atoms.



## Computational studies

Calculations were performed using SPARTAN '10 for Windows [build 1.1.0 (Mar 20 2011)] software, supplied by Wavefunction Inc. Energies of the respective conformers were calculated using the G3(MP2) composite method.<sup>5</sup>

---

### References

- 1 B. Barton, M. R. Caira, E. C. Hosten and C. W. McClelland, *Tetrahedron*, 2013, **69**, 8713.
- 2 Z. Shan, X. Hu, Y. Zhou, X. Peng and Z. Li, *Helv. Chim. Acta*, 2010, **93**, 497.
- 3 Sheldrick, G. M. (2004). *CELL NOW*. University of Göttingen, Germany.
- 4 Sheldrick, G.M. *Acta Cryst.* **2008**, *A64*, 112-122.
- 5 L. A. Curtiss, K. Raghavachari, P. C. Redfern, V. Rassolov and J. A. Pople, *J. Chem. Phys.*, 1998, **109**, 7764.
